# Supplementary material for: A review of protocols for human iPSC culture, cardiac differentiation, subtype-specification, maturation, and direct reprogramming
Source: PubMed Central journal article supplement — STAR Protoc. 2022 Aug 18;3(3):101560. doi: 10.1016/j.xpro.2022.101560 (PMC9405110; doi:10.1016/j.xpro.2022.101560), 2022-08-18
Supplement: mmc1.pdf [file mmc1.pdf]

| Milestone                                                                                             | Cellular model | Culture substrate        | Pluripotency media      | Dissociation reagent            | Differentiation format | Timeline, growth factors, small molecules, and basal media                                                                                                                 |    |    |    |    |    |    |    |    |    |     |     | Efficiency     | Reference                              |
|-------------------------------------------------------------------------------------------------------|----------------|--------------------------|-------------------------|---------------------------------|------------------------|----------------------------------------------------------------------------------------------------------------------------------------------------------------------------|----|----|----|----|----|----|----|----|----|-----|-----|----------------|----------------------------------------|
|                                                                                                       |                |                          |                         |                                 |                        | d0                                                                                                                                                                         | d1 | d2 | d3 | d4 | d5 | d6 | d7 | d8 | d9 | d10 | d11 |                |                                        |
| Spontaneous differentiation                                                                           | hESC           | MEF                      | KO-DMEM, 20% FBS        | Collagenase IV                  | EB                     | 20% FBS<br>KO-DMEM                                                                                                                                                         |    |    |    |    |    |    |    |    |    |     |     | 8% OF EBs      | Kahari et al., 2001                    |
| Co-culture differentiation                                                                            | hESC           | MEF                      | DMEM, 20% FBS           | Dispase                         | Colonies               | 20% FBS, END-2 cells<br>DMEM                                                                                                                                               |    |    |    |    |    |    |    |    |    |     |     | N/S            | Mummary et al., 2003                   |
| Growth-factor Ebs                                                                                     | hESC           | Matrigel                 | MEF-CM                  | Trypsin                         | EB                     | Actin A, FGF2<br>20% FBS<br>CDM-PVA (MDMF12, ascorbic acid, 1TG, insulin, transferrin, PVA)                                                                                |    |    |    |    |    |    |    |    |    |     |     | 24% of EBs     | Burridge et al., 2007                  |
| Growth factor monolayer                                                                               | hESC           | Matrigel                 | MEF-CM                  | Collagenase IV or EDTA          | Monolayer              | Actin A<br>BMP4<br>RPMI+B27                                                                                                                                                |    |    |    |    |    |    |    |    |    |     |     | 30% MYH1+      | Lafamme et al., 2007                   |
| First application of a small molecule (SB203580)                                                      | hESC           | HF                       | KO-DMEM, 20% KSR, FGF2  | Collagenase IV                  | EB                     | SB203580<br>END-2 conditioned: DMEM, NEAA, insulin, transferrin, sodium selenite, 2ME                                                                                      |    |    |    |    |    |    |    |    |    |     |     | 22% MYH6+      | Graichen et al., 2008                  |
| First chemically-defined medium, insulin has negative effects early in differentiation                | hESC           | MEF                      | KO-DMEM, 20% KSR, FGF2  | Collagenase IV                  | EB                     | PGI2, SB203580<br>DMEM, NEAA, transferrin, sodium selenite, 2ME                                                                                                            |    |    |    |    |    |    |    |    |    |     |     | 11% MYH6+      | Xu et al., 2008                        |
| Increased efficiency via Wnt inhibition                                                               | hESC           | MEF                      | DMEM/F12, 20% KSR, FGF2 | Trypsin                         | EB                     | BMP4<br>BMP4, Actin A, FGF2<br>DKK1, VEGFA<br>StemPro-34, ascorbic acid                                                                                                    |    |    |    |    |    |    |    |    |    |     |     | 50% TNNT2+     | Yang et al., 2008                      |
| Concentration optimization leads to increased efficiency                                              | hESC           | MEF                      | DMEM, 20% KSR, FGF2     | ReproCELL Dissociation Solution | EB                     | BMP4, 20% FBS<br>20% FBS<br>DMEM, NEAA, 2ME                                                                                                                                |    |    |    |    |    |    |    |    |    |     |     | 98% of EBs     | Takei et al., 2009                     |
| Stage specific effects of Wnt/catenin modulation                                                      | hESC           | Matrigel                 | MEF-CM, FGF2            | Collagenase IV                  | Monolayer              | Actin A, WNT3A<br>BMP4<br>DKK1<br>RPMI+B27                                                                                                                                 |    |    |    |    |    |    |    |    |    |     |     | 49% MYH1+      | Paige et al., 2010                     |
| Identification of developmentally-relevant stage-specific signaling requirements                      | hESC, hiPSC    | MEF, then Matrigel       | DMEM/F12, 20% KSR, FGF2 | Collagenase B, trypsin          | EB                     | BMP4<br>BMP4, Actin A, FGF2<br>DKK1, VEGFA<br>VEGFA, FGF2<br>StemPro-34, ascorbic acid, L-glutamine, 1TG                                                                   |    |    |    |    |    |    |    |    |    |     |     | 50-70% TNNT2+  | Katman et al., 2011                    |
| Optimization of chemically-defined media leads to higher efficiency                                   | hiPSC          | Gettex                   | MEF-CM                  | TrypLE                          | EB                     | BMP4, FGF2<br>20% FBS or HSA<br>RPMI+PVA<br>RPMI, ascorbic acid<br>RPMI, insulin, lipids                                                                                   |    |    |    |    |    |    |    |    |    |     |     | 94% of EBs     | Burridge et al., 2011                  |
| Wnt inhibition via small molecule                                                                     | hiPSC          | MEF                      | DMEM/F12, 20% KSR, FGF2 | Collagenase IV                  | EB                     | 20% FBS, BMP4<br>20% FBS<br>20% FBS, IWR-1<br>20% FBS<br>2.5% FBS<br>KO-DMEM, NEAA, BME                                                                                    |    |    |    |    |    |    |    |    |    |     |     | 16% TNNT2+     | Ren et al., 2011                       |
| Serum-free, small molecule-based Wnt inhibition                                                       | hESC           | MEF                      | KO-DMEM, 20% KSR, FGF2  | Collagenase IV                  | EB                     | BMP4<br>BMP4, Actin A, FGF2<br>IWR-1<br>IWR-1, FGF2, VEGFA<br>LIF2, VEGFA<br>2% FBS<br>StemPro-34<br>DMEM                                                                  |    |    |    |    |    |    |    |    |    |     |     | 30% MYH6+      | Willems et al., 2011                   |
| Differentiation in both EB and monolayer formats                                                      | hESC           | Low density MEF          | DMEM/F12, 20% KSR, FGF2 | TrypLE                          | EB and monolayer       | BMP4, WNT3A, Actin A, VEGFA, SCF<br>LI-APEL (MDMF12, PFHM-II, PVA, BSA, lipids, ITS, 1TG), ascorbic acid<br>LI-AEL (MDMF12, PFHM-II, BSA, lipids, ITS, 1TG), ascorbic acid |    |    |    |    |    |    |    |    |    |     |     | ~25% GFP+      | Elliott et al., 2011                   |
| First protocol utilizing solely small molecules                                                       | hESC           | Matrigel                 | MEF-CM                  | Accutase                        | Monolayer              | CHIR99021<br>IWR-1, SB431542, pumorphamine<br>DMEM/F12+N2+B27<br>RPMI+B27                                                                                                  |    |    |    |    |    |    |    |    |    |     |     | 70-80% NKX2-6+ | Gonzalez et al., 2011                  |
| Use of dual GSK3β inhibitors and a novel Wnt-inhibitor                                                | hESC, hiPSC    | Gelatin or laminin-211   | DMEM/F12, 20% KSR       | CTK dissociation solution       | EB                     | CHIR99021, BIO<br>KY02111, XAV939<br>IMDM, NEAA, BME, HSA or BSA                                                                                                           |    |    |    |    |    |    |    |    |    |     |     | 98% TNNT2+     | Minami et al., 2012                    |
| Defined pluripotent media, small molecule-based differentiation                                       | hESC, hiPSC    | Matrigel or Synthemax    | mTeSR1                  | TrypLE                          | Monolayer              | CHIR99021<br>IWP-4<br>RPMI+B27 without insulin<br>RPMI+B27                                                                                                                 |    |    |    |    |    |    |    |    |    |     |     | 85% TNNT2+     | Lian et al., 2012<br>Lian et al., 2013 |
| Protein transduction-based differentiation                                                            | hESC           | Suspension               | MEF-CM                  | Trypsin                         | EB                     | Actin A<br>ISL1, BMP4<br>ISL1<br>RPMI+B27                                                                                                                                  |    |    |    |    |    |    |    |    |    |     |     | 75% TNNT2+     | Fonoudi et al., 2013                   |
| First chemically-defined, small molecule-based differentiation in multiple lines and various matrices | hESC, hiPSC    | Synthemax or laminin-521 | E8                      | EDTA                            | Monolayer              | CHIR99021<br>Wnt-C59<br>CDM3 (RPMI, recombinant HSA, ascorbic acid 2-phosphate)                                                                                            |    |    |    |    |    |    |    |    |    |     |     | 95% TNNT2+     | Burridge et al., 2014                  |
| BMP inhibition-based differentiation                                                                  | hESC, hiPSC    | Matrigel                 | mTeSR1                  | RelLeSR                         | Monolayer              | CHIR99021<br>DMH1<br>DMEM/F12+B27                                                                                                                                          |    |    |    |    |    |    |    |    |    |     |     | 75% TNNT2+     | Aguilar et al., 2015                   |
| Albumin-free                                                                                          | hESC, hiPSC    | Matrigel                 | FTDA                    | Accutase                        | EB and monolayer       | BMP4, FGF2, CHIR<br>IWP-2 or Wnt-C59<br>KO-DMEM, ascorbic acid, transferrin, sodium selenite (insulin and Y27632 for first day)                                            |    |    |    |    |    |    |    |    |    |     |     | 80-95% TNNT2+  | Zhang et al., 2015                     |
| Albumin-free, small molecule-based                                                                    | hESC, hiPSC    | Synthemax                | E8 or mTeSR1            | Accutase                        | Monolayer              | CHIR99021<br>IWP-2<br>RPMI, putrescine, progesterone, sodium selenite<br>RPMI, insulin, ascorbic acid 2-phosphate                                                          |    |    |    |    |    |    |    |    |    |     |     | 88-98% TNNT2+  | Lian et al., 2015                      |
| Use of heparin in lieu of albumin, EB-based                                                           | hESC, hiPSC    | Matrigel                 | E8                      | EDTA                            | Monolayer              | CHIR99021<br>IWP-2<br>DMEM/F12, ascorbic acid, lipids, transferrin, sodium selenite, sodium bicarbonate (heparin from d1-d7)                                               |    |    |    |    |    |    |    |    |    |     |     | 94% TNNT2+     | Lin et al., 2017<br>Lin and Zou, 2020  |
