# Supplementary material for: A review of protocols for human iPSC culture, cardiac differentiation, subtype-specification, maturation, and direct reprogramming
Source: PubMed Central journal article supplement — STAR Protoc. 2022 Aug 18;3(3):101560. doi: 10.1016/j.xpro.2022.101560 (PMC9405110; doi:10.1016/j.xpro.2022.101560), 2022-08-18
Supplement: mmc3.pdf [file mmc3.pdf]

Cardiomyocyte subtype differentiation

| Subtype differentiation | Cellular model | Pluripotency media                   | Differentiation format   | Differentiation protocol, growth factors, small molecules, and media by day of protocol |                       |                                                        |                           |                     |      |    |    |    |    |     |     |                        | Efficiency              | Reference |
|-------------------------|----------------|--------------------------------------|--------------------------|-----------------------------------------------------------------------------------------|-----------------------|--------------------------------------------------------|---------------------------|---------------------|------|----|----|----|----|-----|-----|------------------------|-------------------------|-----------|
|                         |                |                                      |                          | d0                                                                                      | d1                    | d2                                                     | d3                        | d4                  | d5   | d6 | d7 | d8 | d9 | d10 | d11 | d12                    |                         |           |
| Atrial                  | hESCs          | MEF-CM                               | Monolayer                | BMP4, FGF2                                                                              | Activin A             |                                                        | Noggin                    | retinoic acid, DKK1 | DKK1 |    |    |    |    |     |     | 50% TNNT2+             | Zhang et al., 2011      |           |
|                         |                |                                      |                          | RPMI+B27                                                                                |                       |                                                        |                           |                     |      |    |    |    |    |     |     |                        |                         |           |
|                         | hESCs          | BPEL                                 | EB                       | Activin A, BMP4, stem cell factor, VEGFA, CHIR99021                                     |                       |                                                        | retinoic acid             |                     |      |    |    |    |    |     |     | 50% NKX2-5+            | Devalla et al., 2015    |           |
|                         |                |                                      |                          | BPEL                                                                                    |                       |                                                        |                           |                     |      |    |    |    |    |     |     |                        |                         |           |
|                         | hESC, hiPSC    | StemPro-34                           | EB                       | Activin A, BMP4, FGF2                                                                   | retinol, IWP-2, VEGFA | VEGFA                                                  |                           |                     |      |    |    |    |    |     |     | 85% TNNT2+             | Lee et al., 2017        |           |
|                         |                |                                      |                          | StemPro-34, L-glutamine, ascorbic acid, transferrin, 1TG, hypoxia                       |                       |                                                        |                           |                     |      |    |    |    |    |     |     |                        |                         |           |
|                         | iPSC           | E8 /Stem MACS iPS-Brew XF /Stem Flex | Monolayer                | CHIR99021                                                                               | IWP-2                 | IWP-2, retinoic acid                                   | retinoic acid             |                     |      |    |    |    |    |     |     | 87% TNNT2+             | Kleinsorge et al., 2020 |           |
|                         |                |                                      |                          | RPMI, ascorbic acid 2-phosphate, recombinant HSA                                        |                       |                                                        |                           |                     |      |    |    |    |    |     |     |                        |                         |           |
|                         |                |                                      |                          | RPMI+B27                                                                                |                       |                                                        |                           |                     |      |    |    |    |    |     |     |                        |                         |           |
|                         | hESC, hiPSC    | StemPro-34                           | EB                       | BMP4                                                                                    | Activin A, BMP4, FGF2 | BMP4, SB-431542, retinoic acid, IWP-2, VEGFA, PD173074 | VEGFA                     |                     |      |    |    |    |    |     |     | 50% TNNT2+ /SHOX2+     | Protze et al., 2017     |           |
|                         |                |                                      |                          | StemPro-34, L-glutamine, ascorbic acid, transferrin, 1TG, hypoxia                       |                       |                                                        |                           |                     |      |    |    |    |    |     |     |                        |                         |           |
| Nodal                   | hESC, hiPSC    | hiPSC Medium BioCISO                 | Monolayer                | CHIR99021                                                                               |                       | IWP-2                                                  | BMP4, PD173074, BMS189453 |                     |      |    |    |    |    |     |     | 55% TNNT2+ /NKX2-5-    | Liu et al., 2020        |           |
|                         |                |                                      |                          | RPMI+B27 without insulin                                                                |                       |                                                        |                           |                     |      |    |    |    |    |     |     |                        |                         |           |
|                         |                |                                      |                          | RPMI+B27                                                                                |                       |                                                        |                           |                     |      |    |    |    |    |     |     |                        |                         |           |
|                         | hESC, hiPSC    | E8                                   | Monolayer                | CHIR99021                                                                               |                       | IWP-2                                                  | CHIR99021                 |                     |      |    |    |    |    |     |     | 50% TNNT2+ /NKX2-5-    | Ren et al., 2019        |           |
|                         |                |                                      | RPMI+B27 without insulin |                                                                                         |                       |                                                        |                           |                     |      |    |    |    |    |     |     |                        |                         |           |
|                         |                |                                      | RPMI+B27                 |                                                                                         |                       |                                                        |                           |                     |      |    |    |    |    |     |     |                        |                         |           |
|                         | hESC, hiPSC    | E8                                   | Monolayer                | CHIR99021                                                                               |                       | Wnt-C59                                                |                           |                     |      |    |    |    |    |     |     | 20-30% TNNT2+ /NKX2-5- | Liang et al., 2020      |           |
|                         |                |                                      | RPMI+B27 without insulin |                                                                                         |                       |                                                        |                           |                     |      |    |    |    |    |     |     |                        |                         |           |
