# Supplementary material for: A review of protocols for human iPSC culture, cardiac differentiation, subtype-specification, maturation, and direct reprogramming
Source: PubMed Central journal article supplement — STAR Protoc. 2022 Aug 18;3(3):101560. doi: 10.1016/j.xpro.2022.101560 (PMC9405110; doi:10.1016/j.xpro.2022.101560), 2022-08-18
Supplement: mmc5.pdf [file mmc5.pdf]

| Features                      | Cell types                 |                                   | Cocktails                                            | Efficiency   | Reference                |
|-------------------------------|----------------------------|-----------------------------------|------------------------------------------------------|--------------|--------------------------|
|                               | From                       | To                                |                                                      |              |                          |
| GMT-based cocktail            | CF, TTF                    | MYH6-GFP+                         | <b>GMT</b>                                           | ~ 20%        | Ieda et al., 2010        |
| microRNA                      | CF, MEF                    | Beating cells                     | <b>GMT</b> , miR-133                                 | 7 fold more  | Muraoka et al., 2014     |
|                               | HCF                        | TNNT2+                            | <b>GMT</b> , MESP1, MYOCD, miR-133                   | 23-27%       |                          |
|                               | CF                         | MYH6-GFP+                         | <b>GMT</b>                                           | ~ 30%        | Mohamed et al., 2017     |
|                               | HCF                        | TNNT2-GCaMP5+                     | <b>GMT</b> , MYOCD, ESRRG, MESP1, ZFPM2              | ~ 12%        |                          |
| Chemical compound             | MEF, TTF                   | Beating cells                     | <b>GMT</b> or GHMT                                   | 100 fold     | Yamakawa et al., 2015    |
|                               | TTF                        | Beating cells                     | <b>GMT</b> or GHMT                                   | 4 fold       | Muraoka et al., 2019     |
| Polycistronic puro selection  | CF                         | Beating cells                     | polycistronic <b>MGT</b>                             | 10 fold      | Wang et al., 2014        |
|                               | CFs, TTFs                  | MYH6-GFP+/TNNT2+                  | GHMT                                                 | 5-20%        | Song et al., 2012        |
| Optimized GHMT-based cocktail | MEF                        | Beating cells                     | <b>GHMT</b> Akt1                                     | 50.0%        | Zhou et al., 2015        |
|                               | CF, TTF                    |                                   |                                                      | ~0.8%        |                          |
|                               | MEF, CF, TTF               | MYH6-GFP+/TNNT2+<br>Beating cells | <b>GHMT</b> , Akt1, PHF7                             | > 20%        | Garry et al., 2021       |
|                               | HCF                        | MYH6-GFP+/TNNT2+                  | <b>GHMT</b> , Myocd, PHF7                            | ~ 3%         |                          |
| Chamber-specific subtype      | MEF, TTF                   | Sarcomere+/HCN4-GFP+              | <b>GHMT</b>                                          | 1% x ~32%    | Nam et al., 2014         |
|                               |                            | Sarcomere+/HCN4-GFP-/MYL2+        |                                                      | 1% x ~22%    |                          |
|                               | Sarcomere+/HCN4-GFP-/NPPA+ | 1% x ~35%                         |                                                      |              |                          |
|                               | MEF                        | MYL7+/TNNI3+                      | Polycistronic <b>M-G-T-H</b>                         | ~26%         | Zhang et al., 2019, 2021 |
|                               |                            | MYL2+/TNNI3+                      |                                                      | ~16%         |                          |
|                               |                            | Sarcomere+, beating cells         |                                                      | ~5-6 fold    |                          |
| Human Fibroblasts             | H9F                        | MYH6-mCherry+/TNNT2+              | GMT, ESRRG, MESP1, MYOCD, ZFPM2 ( <b>7F</b> )        | 13.0% ± 9.3% | Fu et al., 2013          |
|                               | HCF, HDF                   | ACTN2+/TNNT2+                     |                                                      | 1-4%         |                          |
|                               | HFF, AHCF, AHDF            | TNNT2+                            | GHT, Myocd, miR-1, miR-133 ( <b>6F</b> )             | ~10-35%      | Nam et al., 2013         |
|                               | HCF, HDF                   | ACTN2+ or TNNT2+                  | GMT, Mesp1, Myocd ( <b>GMTMM</b> )                   | ~ 5%         | Wada et al., 2013        |
| MicroRNA combo                | H9F, HCF                   | TNNT2+                            | Polycistronic hMGT + miR-133 ( <b>MGT133</b> )       | 40-60%       | Garbutt et al., 2020     |
|                               | MEF, CF                    | MYH6-CFP+                         | miR-1, miR-133, miR-208, miR-499 ( <b>miRcombo</b> ) | ~13-27%      | Jayawardena et al., 2012 |
| Chemical only approach        | MEF, TTF                   | ACTN2+ or MYH6+                   | small-molecule combination <b>CRFVPT</b>             | ~10-15%      | Fu et al., 2015          |
|                               | HFF                        | TNNT2+ cells                      | 9 chemical compounds ( <b>9C</b> )                   | 6.6 ± 0.4%   | Cao et al., 2016         |
|                               | HLF                        |                                   |                                                      | 5.5%         |                          |
