# Supplementary material for: A review of protocols for human iPSC culture, cardiac differentiation, subtype-specification, maturation, and direct reprogramming
Source: PubMed Central journal article supplement — STAR Protoc. 2022 Aug 18;3(3):101560. doi: 10.1016/j.xpro.2022.101560 (PMC9405110; doi:10.1016/j.xpro.2022.101560), 2022-08-18
Supplement: mmc7.pdf [file mmc7.pdf]

| Cell source     | Pre-reprogramming media      | Reprogramming protocol, viral infection, small molecules and medium |                                                                                                                                                                                                 |                           |                            |                    |    |    |                    |    |      |                                                                                           |     |     |              |                                 |                            | Reference                       |                       |                          |    |
|-----------------|------------------------------|---------------------------------------------------------------------|-------------------------------------------------------------------------------------------------------------------------------------------------------------------------------------------------|---------------------------|----------------------------|--------------------|----|----|--------------------|----|------|-------------------------------------------------------------------------------------------|-----|-----|--------------|---------------------------------|----------------------------|---------------------------------|-----------------------|--------------------------|----|
|                 |                              | d0                                                                  | d1                                                                                                                                                                                              | d2                        | d3                         | d4                 | d5 | d6 | d7                 | d8 | d9   | d10                                                                                       | d11 | d12 | d13          | d14                             | 3w                         |                                 | 4w                    | 5w                       | 6w |
| CF, TTF         | DMEM, 10% FBS                | Infection                                                           |                                                                                                                                                                                                 |                           |                            |                    |    |    |                    |    | Flow |                                                                                           |     |     |              |                                 | Ca <sup>2+</sup> flux      | Beating                         |                       | Ieda et al., 2010        |    |
|                 |                              |                                                                     | iCM medium (high glucose DMEM/M199(4:1), 10% FBS)                                                                                                                                               |                           |                            |                    |    |    |                    |    |      |                                                                                           |     |     |              |                                 |                            |                                 |                       |                          |    |
| CF, MEF         | DMEM, 10% FBS                | Infection                                                           |                                                                                                                                                                                                 |                           |                            |                    |    |    |                    |    | Flow |                                                                                           |     |     |              |                                 |                            | Ca <sup>2+</sup> flux / Beating |                       | Muraoka et al., 2014     |    |
| HCF             |                              |                                                                     | iCM medium                                                                                                                                                                                      |                           |                            |                    |    |    |                    |    |      |                                                                                           |     |     |              |                                 |                            |                                 |                       |                          |    |
| CF              | IMDM, 20% FBS                | Infection                                                           | SB431542                                                                                                                                                                                        | XAV939                    |                            |                    |    |    |                    |    |      | Beating                                                                                   |     |     |              | Flow                            |                            | Ca <sup>2+</sup> flux           |                       | Mohamed et al., 2017     |    |
|                 |                              |                                                                     | iCM medium, NEAA, sodium pyruvate, Glutamax                                                                                                                                                     |                           |                            |                    |    |    |                    |    |      |                                                                                           |     |     |              |                                 |                            |                                 |                       |                          |    |
| HCF             | IMDM, 20% FBS                | Infection                                                           | SB431542                                                                                                                                                                                        | XAV939                    |                            |                    |    |    |                    |    |      |                                                                                           |     |     |              |                                 | Flow/Ca <sup>2+</sup> flux |                                 |                       |                          |    |
|                 |                              |                                                                     | iCM, NEAA, sodium pyruvate, Glutamax                                                                                                                                                            |                           |                            | iCM:RPMI+B27 (3:1) |    |    | iCM:RPMI+B27 (1:1) |    |      | iCM:RPMI+B27 (3:1)                                                                        |     |     | iCM          |                                 |                            |                                 |                       |                          |    |
| MEF, TTF        | DMEM, 10% FBS                | Infection                                                           |                                                                                                                                                                                                 |                           |                            |                    |    |    |                    |    |      |                                                                                           |     |     |              |                                 |                            | Beating                         |                       | Yamakawa et al., 2015    |    |
|                 | IMDM, 20% FBS                |                                                                     | iCM medium                                                                                                                                                                                      |                           |                            |                    |    |    |                    |    |      |                                                                                           |     |     |              |                                 |                            |                                 |                       |                          |    |
|                 |                              |                                                                     | FFV medium (StemPro-34, Glutamax, ascorbic acid, FGF2, FGF10, VEGFA)                                                                                                                            |                           |                            |                    |    |    |                    |    |      |                                                                                           |     |     |              |                                 |                            |                                 |                       |                          |    |
| TTF             | IMDM, 20% FBS                | Infection                                                           |                                                                                                                                                                                                 | one dose diclofenac d0-d4 |                            |                    |    |    |                    |    |      |                                                                                           |     |     |              |                                 |                            | Flow                            | Beating               | Muraoka et al., 2019     |    |
|                 |                              |                                                                     | iCM medium                                                                                                                                                                                      |                           |                            |                    |    |    |                    |    |      |                                                                                           |     |     |              |                                 |                            |                                 |                       |                          |    |
|                 |                              |                                                                     | FFV medium                                                                                                                                                                                      |                           |                            |                    |    |    |                    |    |      |                                                                                           |     |     |              |                                 |                            |                                 |                       |                          |    |
| CF              | IMDM, 15% FBS                | Infection                                                           |                                                                                                                                                                                                 | puromycin                 |                            |                    |    |    |                    |    |      | Flow                                                                                      |     |     |              |                                 |                            |                                 |                       | Wang et al., 2014        |    |
|                 |                              |                                                                     | iCM medium                                                                                                                                                                                      |                           |                            |                    |    |    |                    |    |      |                                                                                           |     |     |              |                                 |                            |                                 |                       |                          |    |
| CF, TTF         | DMEM, 15% FBS                | Infection                                                           |                                                                                                                                                                                                 |                           |                            |                    |    |    |                    |    |      |                                                                                           |     |     |              | Flow                            |                            | Flow                            | Beating               | Song et al., 2012        |    |
|                 | iCM, 15% FBS                 |                                                                     | Cardiac induction medium (DMEM/199 (4:1), 10% FBS, 5% horse serum, NEAA, EAAs, B-27, ITS, vitamin mixture, sodium pyruvate), 10% conditioned medium obtained from neonatal rat/mouse CM culture |                           |                            |                    |    |    |                    |    |      |                                                                                           |     |     |              |                                 |                            |                                 |                       |                          |    |
| MEF             | DMEM, 10% FBS                | Infection 1 & 2                                                     |                                                                                                                                                                                                 |                           |                            |                    |    |    |                    |    |      | Flow                                                                                      |     |     |              | Flow                            |                            | Flow / Beating                  |                       | Zhou et al., 2015        |    |
| CF, TTF         |                              |                                                                     | Cardiac induction medium, 10% conditioned medium obtained from neonatal rat/mouse CM culture                                                                                                    |                           |                            |                    |    |    |                    |    |      |                                                                                           |     |     |              |                                 |                            |                                 |                       |                          |    |
| MEF, CF, TTF    |                              | Infection 1 & 2                                                     |                                                                                                                                                                                                 |                           |                            |                    |    |    |                    |    |      |                                                                                           |     |     |              | Ca <sup>2+</sup> flux / Beating |                            |                                 |                       |                          |    |
|                 | DMEM, 10% FBS                |                                                                     | Cardiac induction medium                                                                                                                                                                        |                           |                            |                    |    |    |                    |    |      |                                                                                           |     |     |              |                                 |                            |                                 |                       |                          |    |
| HCF             |                              | Infection                                                           |                                                                                                                                                                                                 |                           |                            |                    |    |    |                    |    |      |                                                                                           |     |     |              |                                 | Flow                       |                                 |                       | Garry et al., 2021       |    |
|                 |                              |                                                                     | iCM, NEAA                                                                                                                                                                                       |                           |                            | iCM:RPMI+B27 (3:1) |    |    | iCM:RPMI+B27 (1:1) |    |      | iCM:RPMI+B27 (1:3)                                                                        |     |     | RPMI+B27+FFV |                                 |                            |                                 |                       |                          |    |
| MEF, TTF        | DMEM, 10% FBS                | Infection                                                           |                                                                                                                                                                                                 |                           |                            |                    |    |    |                    |    |      | Flow                                                                                      |     |     |              | Flow                            |                            | Flow / Beating                  |                       | Nam et al., 2014         |    |
|                 |                              |                                                                     | Cardiac induction medium, 10% conditioned medium obtained from neonatal rat/mouse CM culture                                                                                                    |                           |                            |                    |    |    |                    |    |      |                                                                                           |     |     |              |                                 |                            |                                 |                       |                          |    |
| MEF             | DMEM, 10% FBS                | Infection 1 & 2                                                     |                                                                                                                                                                                                 |                           |                            |                    |    |    |                    |    |      |                                                                                           |     |     |              |                                 |                            | Flow / Beating                  |                       | Zhang et al., 2019, 2021 |    |
|                 |                              |                                                                     | Cardiac induction medium, SB431542, A83-01                                                                                                                                                      |                           |                            |                    |    |    |                    |    |      |                                                                                           |     |     |              |                                 |                            |                                 |                       |                          |    |
| H9F             | DMEM, 10% FBS                | Infection                                                           |                                                                                                                                                                                                 |                           |                            |                    |    |    |                    |    |      |                                                                                           |     |     |              | Flow                            |                            | Ca <sup>2+</sup> flux           | AP (10w)              | Fu et al., 2013          |    |
| HCF, HDF        |                              |                                                                     | iCM medium, NEAA                                                                                                                                                                                |                           |                            |                    |    |    |                    |    |      |                                                                                           |     |     |              |                                 |                            |                                 |                       |                          |    |
|                 |                              |                                                                     | RPMI+B27                                                                                                                                                                                        |                           |                            |                    |    |    |                    |    |      |                                                                                           |     |     |              |                                 |                            |                                 |                       |                          |    |
| HFF, AHCF, AHDF | DMEM, 10% FBS                | Infection 1 & 2                                                     |                                                                                                                                                                                                 |                           |                            |                    |    |    |                    |    |      |                                                                                           |     |     |              |                                 |                            | Flow                            | Ca <sup>2+</sup> (8w) | Nam et al., 2013         |    |
|                 |                              |                                                                     | Cardiac induction medium, 10% conditioned medium obtained from neonatal rat CM culture                                                                                                          |                           |                            |                    |    |    |                    |    |      |                                                                                           |     |     |              |                                 |                            |                                 |                       |                          |    |
| HCF, HDF        | IMDM, 20% FBS                | Infection                                                           |                                                                                                                                                                                                 |                           |                            |                    |    |    |                    |    |      |                                                                                           |     |     |              |                                 |                            | Flow/Ca <sup>2+</sup>           |                       | Wada et al., 2013        |    |
|                 |                              |                                                                     | iCM medium                                                                                                                                                                                      |                           |                            |                    |    |    |                    |    |      |                                                                                           |     |     |              |                                 |                            |                                 |                       |                          |    |
| H9F, HCF        | DMEM, 20% FBS                | Infection                                                           |                                                                                                                                                                                                 |                           |                            | puromycin 1ug/ml   |    |    |                    |    |      |                                                                                           |     |     |              | Flow                            |                            | Ca <sup>2+</sup> flux           |                       | Garbutt et al., 2020     |    |
|                 |                              |                                                                     | iCM medium                                                                                                                                                                                      |                           |                            |                    |    |    |                    |    |      | hiCM medium (RPMI1640, B27, 2% FBS, 0.05% BSA, ascorbic acid 2-phosphate, Glutamax, NEAA) |     |     |              |                                 |                            |                                 |                       |                          |    |
| MEF, CF         | DMEM, 15% FBS                | transfecto                                                          |                                                                                                                                                                                                 |                           | JAK inhibitor I (5-8 days) |                    |    |    |                    |    |      |                                                                                           |     |     |              | Flow                            |                            |                                 |                       | Jayawardena et al., 2012 |    |
|                 |                              |                                                                     | DMEM, 15% FBS                                                                                                                                                                                   |                           |                            |                    |    |    |                    |    |      |                                                                                           |     |     |              |                                 |                            |                                 |                       |                          |    |
| MEF, TTF        | DMEM, 15%FBS, Glutamax, NEAA |                                                                     | CHIR99021 (C), RepSox (R), Forskolin (F), VPA (V), Pamate (P), TTNPB (T)                                                                                                                        |                           |                            |                    |    |    |                    |    |      |                                                                                           |     |     |              | Beating (d16)                   |                            | Fu et al., 2015                 |                       |                          |    |
|                 |                              |                                                                     | CRM (DMEM, 15% FBS, 5% KSR, N2, B27, Glutamax, NEAA, 2ME, ascorbic acid 2-phosphate)                                                                                                            |                           |                            |                    |    |    |                    |    |      |                                                                                           |     |     |              |                                 |                            |                                 |                       |                          |    |
|                 |                              |                                                                     | CRM (DMEM, 15% FBS, 5% KSR, N2, B27, Glutamax, NEAA, 2ME, ascorbic acid 2-phosphate) (d22-24)                                                                                                   |                           |                            |                    |    |    |                    |    |      |                                                                                           |     |     |              |                                 |                            |                                 |                       |                          |    |
| HFF             | DMEM, 10%FBS, Glutamax, NEAA |                                                                     | CHIR99021, BIX01294, AS8351, SC1, Y27632, OAC2, SU16F, JUN10198409, A8301                                                                                                                       |                           |                            |                    |    |    |                    |    |      | CHIR99021, BMP4, activin A, VEGFA                                                         |     |     |              |                                 |                            |                                 | Cao et al., 2016      |                          |    |
| HLF             |                              |                                                                     | DMEM, 5% FBS, 10% KSR, ITS, ascorbic acid 2-phosphate, 2ME, Glutamax, NEAA                                                                                                                      |                           |                            |                    |    |    |                    |    |      | RPMI+B27 without insulin, Glutamax, 1TG                                                   |     |     |              |                                 |                            | hiCM medium                     |                       |                          |    |
