# Supplementary material for: A review of protocols for human iPSC culture, cardiac differentiation, subtype-specification, maturation, and direct reprogramming
Source: PubMed Central journal article supplement — STAR Protoc. 2022 Aug 18;3(3):101560. doi: 10.1016/j.xpro.2022.101560 (PMC9405110; doi:10.1016/j.xpro.2022.101560), 2022-08-18
Supplement: mmc9.pdf [file mmc9.pdf]

| Cells            | Overexpressed Genes                                   | Virus      | Backbone                                  | Transfection        | Polybrene | Positive selection   | Induction system | Reference                |
|------------------|-------------------------------------------------------|------------|-------------------------------------------|---------------------|-----------|----------------------|------------------|--------------------------|
| Platinum E cells | <b>GMT</b>                                            | Retrovirus | pMXs                                      | FuGene6 (Roche)     |           |                      |                  | Ieda et al., 2010        |
| Platinum E cells | Myc-tagged <b>GHMT</b>                                | Retrovirus | pBabeX                                    | FuGene6 (Roche)     | 6 µg/mL   |                      |                  | Song et al., 2012        |
| HEK293 FT        | <b>GMT</b> , ESRRG, MESP1, MYOCD, ZFPM2 ( <b>7F</b> ) | Lentivirus | pLVX-tetO-cDNA<br>pLVX-Tight-Puro<br>pMXs | Lipofectamine 2000  | 4 µg/mL   |                      | 1 µg/mL Dox      | Fu et al., 2013          |
|                  |                                                       | Retrovirus | Retro-X-Tet-ON<br>pRetro-X-Tight-cDNA     | FuGene6 (Promega)   | 5 µg/mL   | puromycin & neomycin | 100 ng/mL Dox    |                          |
| Platinum A cells | <b>GMT</b> , Mesp1, Myocd                             | Retrovirus | pBabeX                                    | FuGene6 (Promega)   | 6 µg/mL   |                      |                  | Nam et al., 2013         |
| PLAT-GP cells    | <b>GMT</b> , MESP1, MYOCD (GMTMM)                     | Retrovirus | pMXs                                      | TremeGene 9 (Roche) | 4 µg/mL   |                      |                  | Wada et al., 2013        |
| 293FT cells      |                                                       | Lentivirus | pLVX-rtTA<br>pLVX-tetO-cDNA               | Lipofectamine 2000  | 4 µg/mL   |                      | 1 µg/mL Dox      |                          |
| Platinum A cells | Myc-tagged <b>GHMT</b>                                | Retrovirus | pBabeX                                    | FuGene6 (Promega)   | 6 µg/mL   |                      |                  | Nam et al., 2014         |
| Platinum E cells | <b>GMT</b>                                            | Retrovirus | pMXs                                      | FuGene6 (Roche)     |           |                      |                  | Muraoka et al., 2014     |
| HEK293           | human <b>GMT</b> , MESP1, MYOCD                       | Lentivirus | CSII-CMV-RfA                              | Lipofectamine 2000  |           |                      |                  |                          |
| Platinum E cells | Polycistronic <b>M-G-T</b>                            | Retrovirus | pMXs                                      | Lipofectamine 2000  | 4 µg/mL   | puromycin 2 µg/mL    |                  | Wang et al., 2014        |
| Platinum A cells | <b>GHMT</b><br>Akt1                                   | Retrovirus | pBabeX<br>pMxs-MyrAkt1                    | FuGene6 (Promega)   | 6 µg/µL   |                      |                  | Zhou et al., 2015        |
| Platinum E cells | <b>GHMT</b> , MESP1, MYOCD                            | Retrovirus | pMXs                                      | FuGene6 (Promega)   |           |                      |                  | Yamakawa et al., 2015    |
| Platinum E cells | <b>GMT</b>                                            | Retrovirus | pMXs                                      | FuGene HD (Roche)   | 0.6 µg/mL |                      |                  | Mohamed et al., 2017     |
| Platinum E cells | <b>GMT</b> or <b>GHMT</b>                             | Retrovirus | pMXs                                      | FuGene6             |           |                      | 10 µM diclofenac | Muraoka et al., 2019     |
| Platinum E cells | polycistronic <b>M-G-T-H</b>                          | Retrovirus | pBabeX                                    | FuGene6 (Promega)   | 6 µg/mL   |                      |                  | Zhang et al., 2019, 2021 |
| 293T cells       | Polycistronic human <b>M-G-T</b> , miRNA-133          | Retrovirus | pMXs<br>pBabe                             | Nanofect            | 8 µg/mL   | puromycin 1 µg/mL    |                  | Garbutt et al., 2020     |
| Platinum E cells | <b>GHMT</b> , Myocd, PHF7                             | Retrovirus | pMXs                                      | FuGene6 (Promega)   | 8 µg/mL   |                      |                  | Garry et al., 2021       |
